# Supplementary material for: Evidence that hematopoietic stem cell function is preserved during aging in long-lived S6K1 mutant mice
Source: PubMed Central journal article supplement (PMC5058654; doi:10.18632/oncotarget.8729), 2016-04-13
Supplement: oncotarget-07-29937-s001.pdf [file oncotarget-07-29937-s001.pdf]

# Evidence that hematopoietic stem cell function is preserved during aging in long-lived *S6K1* mutant mice

## Supplementary Material

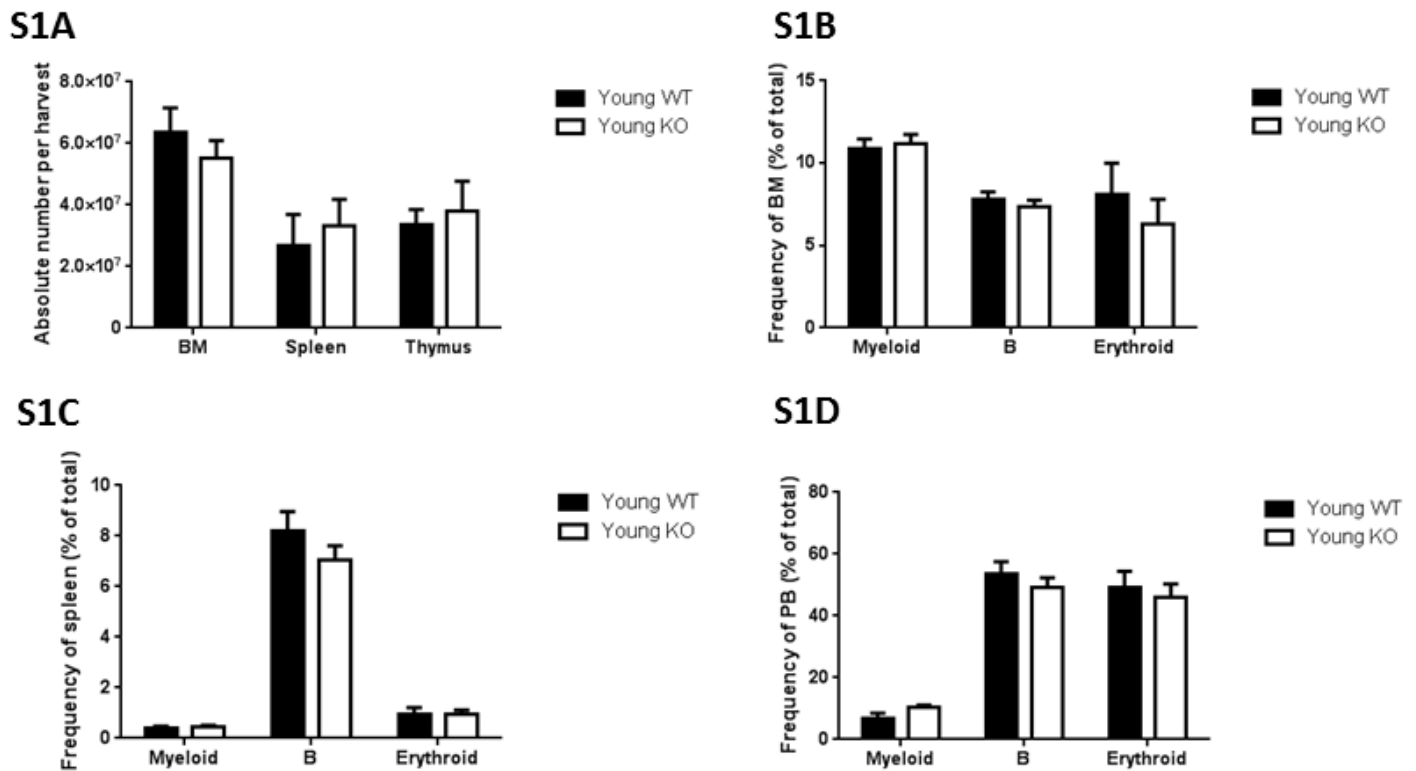

**Figure S1A-D: Young mice.** S1A. Cellularity per harvest in the bone marrow (BM), spleen and thymus of WT and *S6K1*<sup>-/-</sup> mice (n = 9-11, mixed gender). S1B. Frequency of myeloid (Gr-1+, CD11-b+), B (CD19+) and Erythroid (Ter-119+) cells in BM of (n = 9-11, mixed gender). S1C. Frequency of myeloid (Gr-1+, CD11-b+), B (CD19+) and Erythroid (Ter-119+) cells in spleen of (n = 9-11, mixed gender). S1D. Frequency of myeloid (Gr-1+, CD11-b+), B (CD19+) and Erythroid (Ter-119+) cells in PB of (n = 9-11, mixed gender).

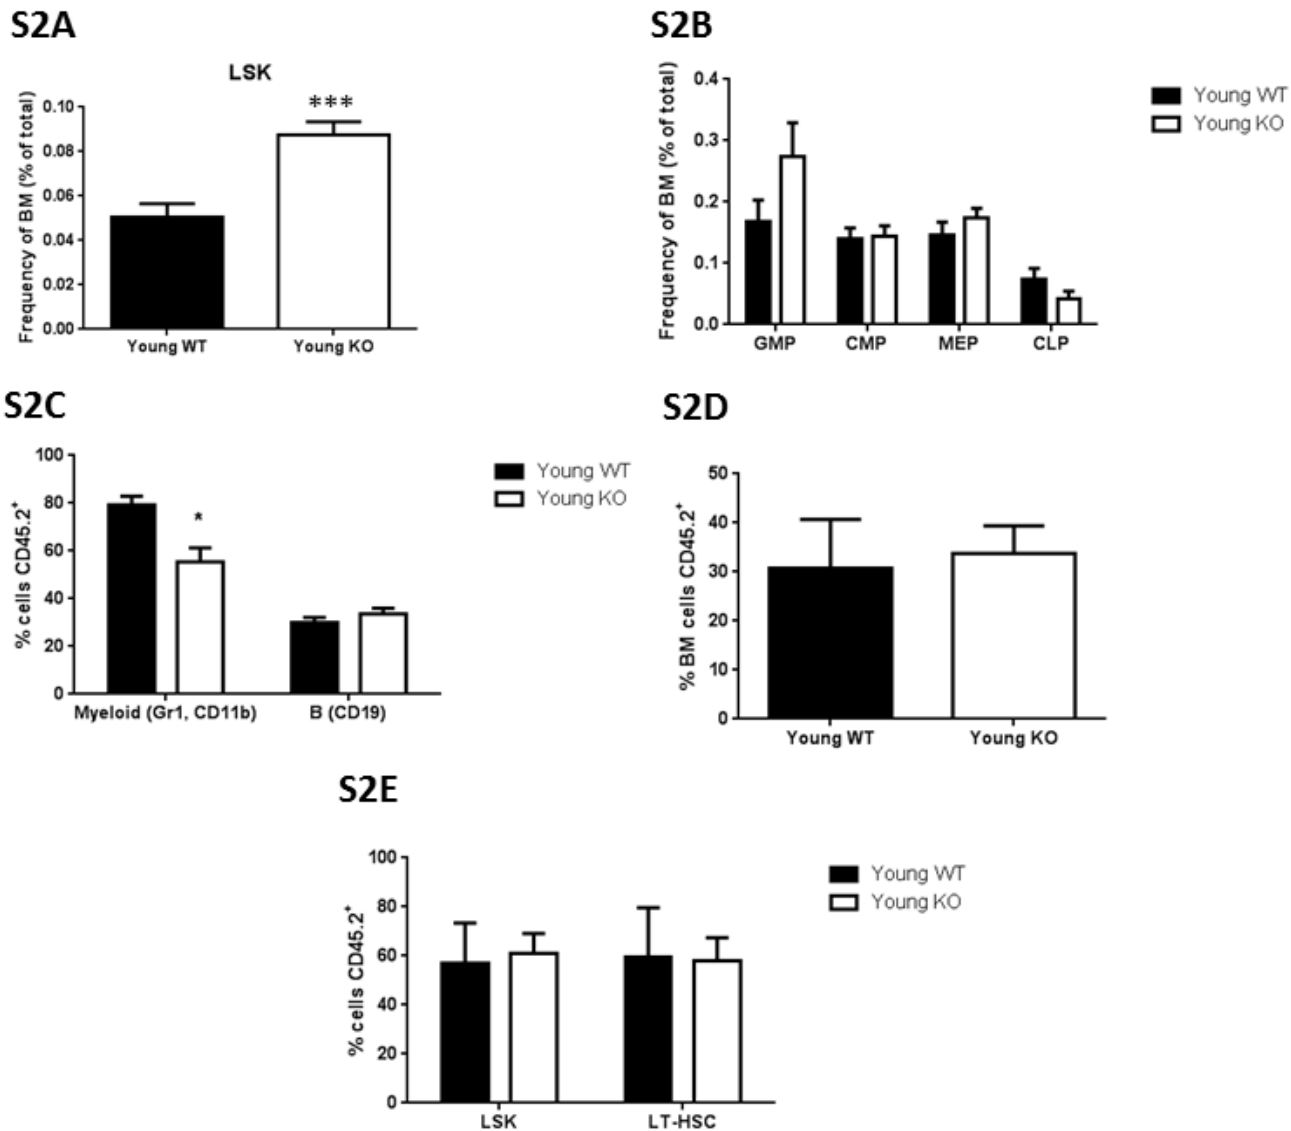

**Figure S2A-E: Young mice.** S2A. Frequency of cells positive for lineage-, c-Kit<sup>+</sup>, Sca-1<sup>+</sup> cells (LSK) in the BM of WT and *S6K1*<sup>-/-</sup> mice (n = 9-11, mixed gender) \*\*\* *P*<0.001. S2B. Frequency of cells positive for progenitor cells (GMP (CD34<sup>+</sup>, CD16/32<sup>+</sup>), CMP (CD34<sup>+</sup>, CD16/32<sup>-</sup>), MEP (CD34<sup>-</sup>, CD16/32<sup>-</sup>) and CLP (CD 127<sup>+</sup>) in the BM of WT and *S6K1*<sup>-/-</sup> mice (n = 9-11, mixed gender). S2C. Percentage of myeloid or B lymphoid cells donor derived (CD45.2<sup>+</sup>) in the BM of transplanted mice (n=5-6 per group). S2D. Percentage of CD45.2<sup>+</sup> in the BM of recipient mice transplanted with young WT or *S6K-1*<sup>-/-</sup> cells (donor cells female, recipients mixed gender, n=5-6 per group). S2E. Percentage of LSK and LT-HSC donor derived (CD45.2<sup>+</sup>) in BM of 16 week post-transplant recipient mice (n=5-6 per group).

**S3A**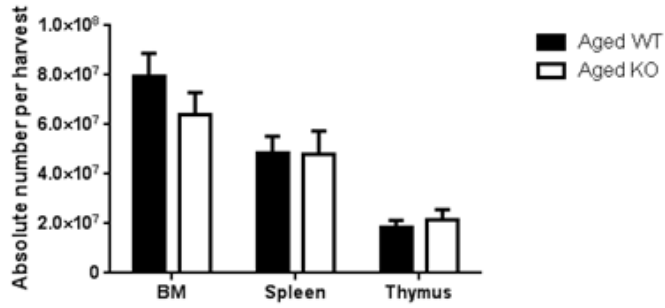**S3B**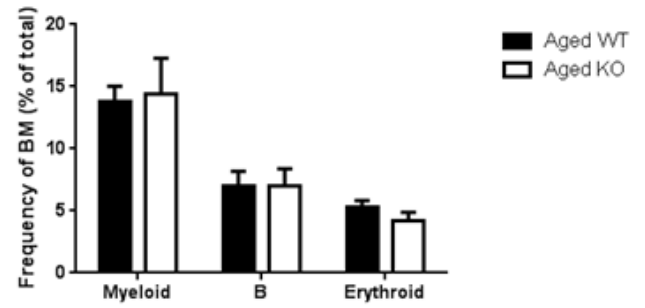**S3C**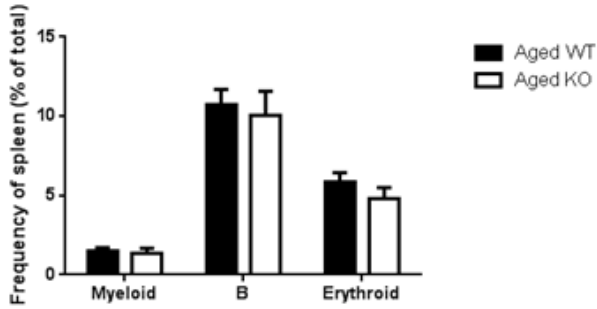**S3D**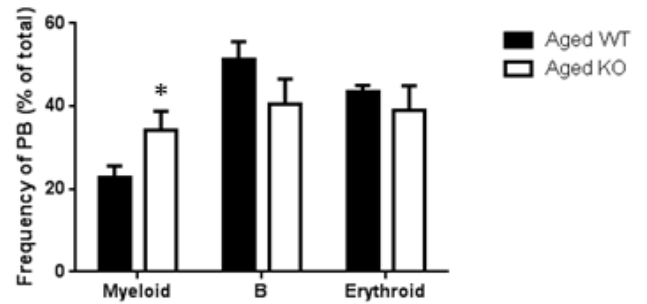

**Figure S3A-D: Aged mice.** S3A. Cellularity per harvest in the BM, spleen and thymii of aged WT and  $S6K1^{-/-}$  mice (n = 11-18, mixed gender). S3B. Frequency of myeloid (Gr-1+, CD11-b+), B (CD19+) and Erythroid (Ter-119+) cells in BM of aged WT and  $S6K1^{-/-}$  mice (n = 11-15, mixed gender). S3C. Frequency of myeloid (Gr-1+, CD11-b+), B (CD19+) and Erythroid (Ter-119+) cells in spleen of aged WT and  $S6K1^{-/-}$  mice (n = 11-15, mixed gender). S3D. Frequency of myeloid (Gr-1+, CD11-b+), B (CD19+) and Erythroid (Ter-119+) cells in the PB of aged WT and  $S6K1^{-/-}$  mice (n = 5-11, mixed gender \*  $P < 0.05$ ).

**S4A**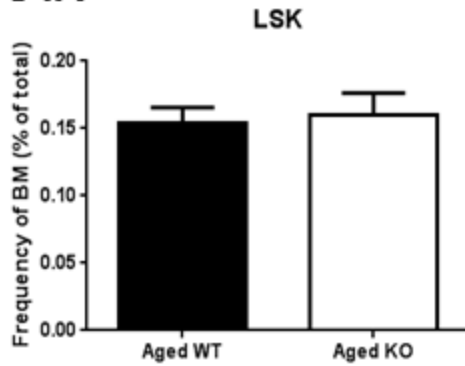**S4B**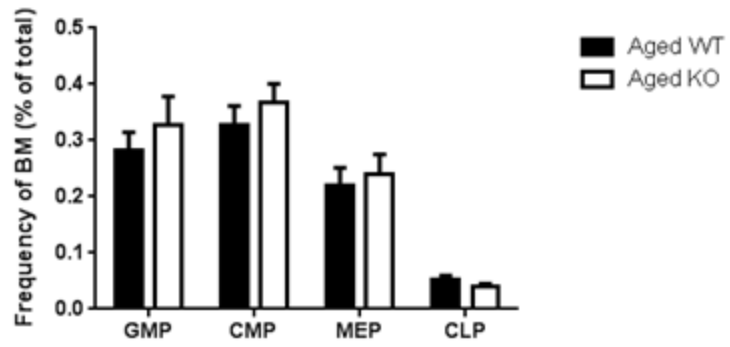**S4C**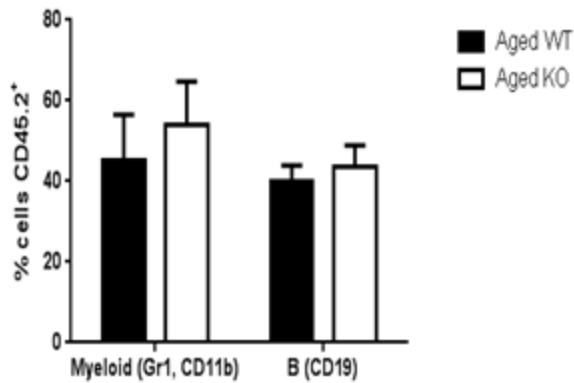**S4D**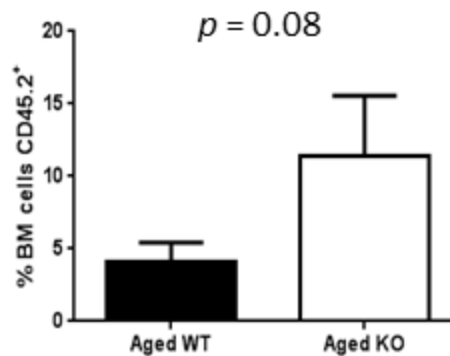

**Figure S4A-D: Aged mice.** S4A. Frequency of cells positive for lineage-, c-Kit+, Sca-1+ cells (LSK) in the BM of aged WT and *S6K1*<sup>-/-</sup> mice (n = 7-15, mixed gender). S4B. Frequency of cells positive for progenitor cells (GMP, CMP, MEP and CLP) in the BM of WT and *S6K1*<sup>-/-</sup> aged mice (n=7-14, mixed gender). S4C. Percentage of myeloid or B lymphoid cells donor derived (CD45.2<sup>+</sup>) in the BM of transplanted mice (n=6 per group). S4D. Percentage of CD45.2<sup>+</sup> in the BM of recipient mice transplanted with aged WT or *S6K-1*<sup>-/-</sup> cells (donor cells female, recipients mixed gender, n=6 per group).

## S5A

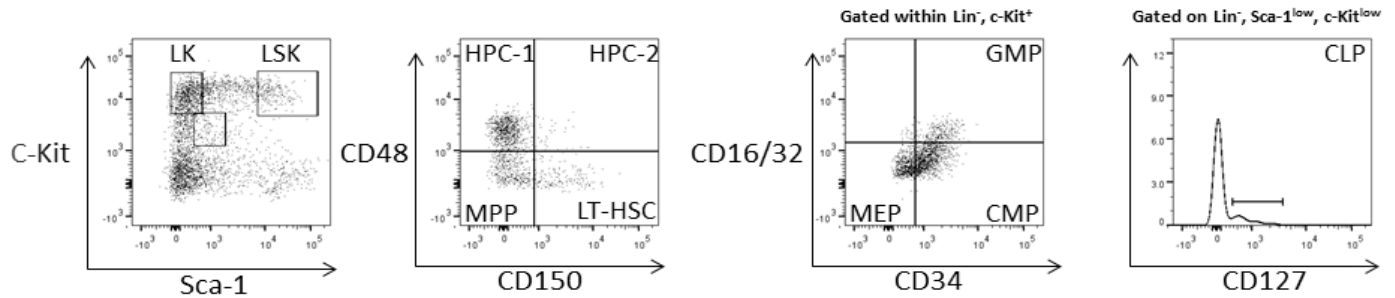

## S5B

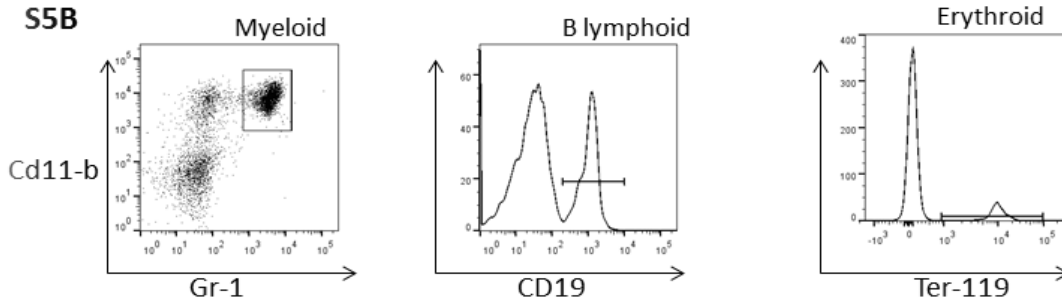

**Figure S5A and B.** S5A shows a representative BM plot displaying cell distribution for Sca-1 and c-Kit within lineage negative cells. Within the LSK population the middle dot plot shows representative staining for CD150 and CD48 to identify HSC sub populations. The right dot plot displays CD34 and CD16/32 staining within the LK population to identify GMP, MEP and CMP populations. Within lineage negative, c-Kit<sup>low</sup> and Sca-1<sup>low</sup> cells, cells were identified as CLP based on CD127<sup>+</sup> expression. S5B shows a representative BM plot displaying cell distribution for Gr-1 and Cd11-b to identify myeloid cells. The middle and right histograms respectively display representative plots displaying CD19<sup>+</sup> cells and Ter-119<sup>+</sup> cells displaying gating strategy for B lymphoid and erythroid cells respectively.

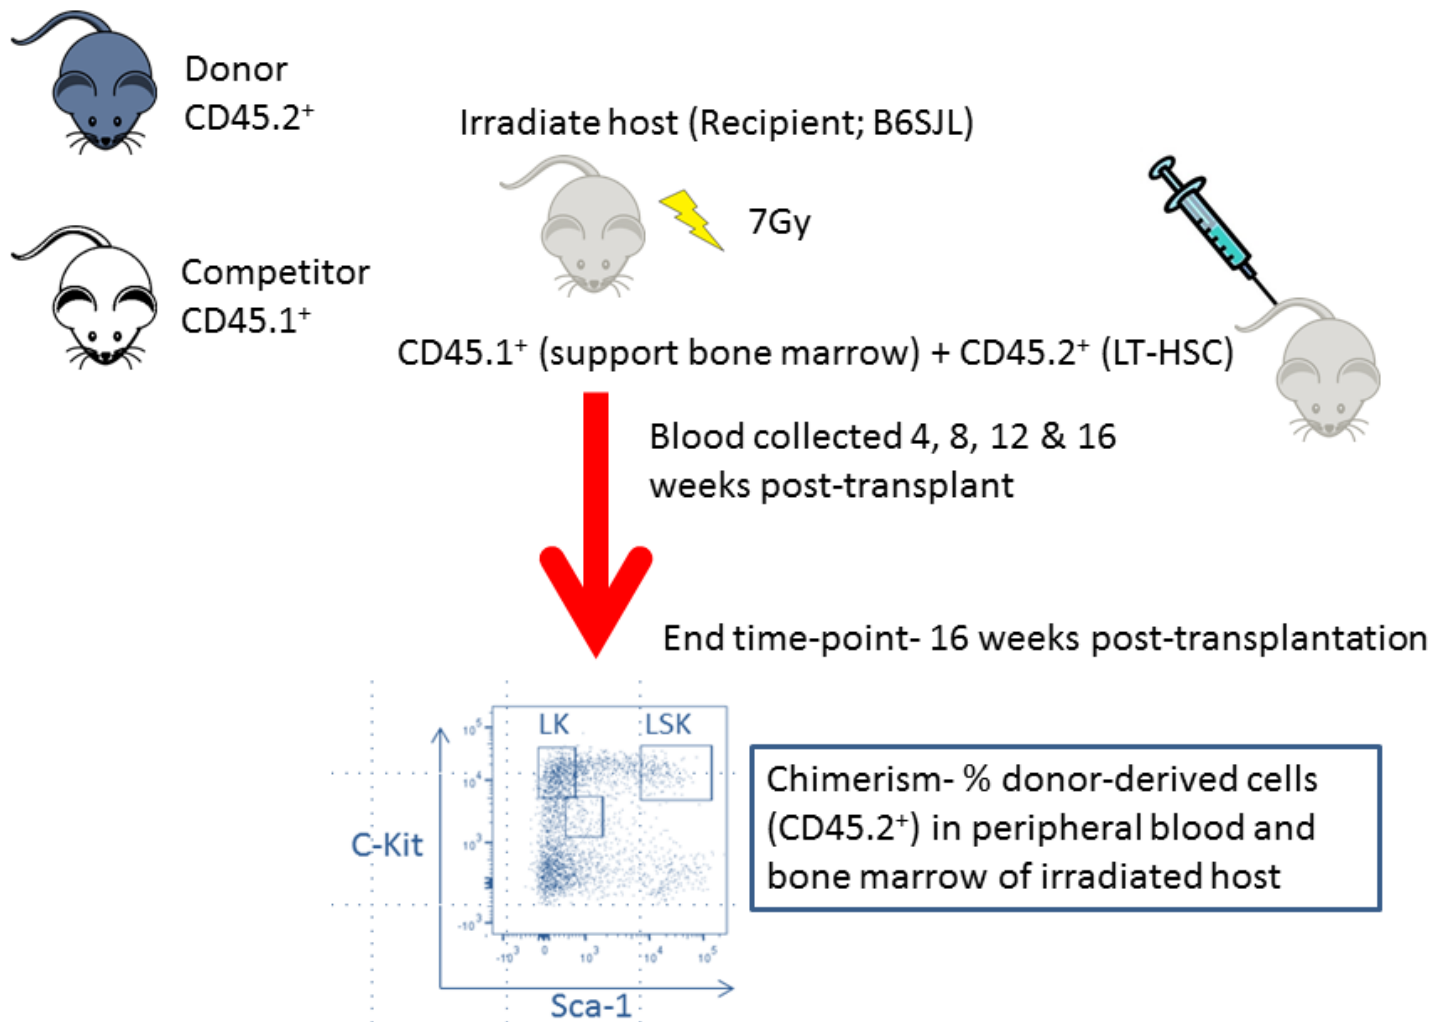

**Figure S6.** Schematic representation of the transplantation experimental protocol employed for both young and aged mice.

**Table S1.** mRNA levels of candidate genes linked to HSC function in c-Kit<sup>+</sup> cells. All data analysed using a general linear model, where all non-significant (NS) interaction effects ( $p>0.05$ ) were subsequently removed from each analysis in order to obtain the best-fitted model in each case. Genotype effects (WT vs *S6K1*<sup>-/-</sup>) and age effects (young 12 wk vs. old 80 weeks). All female mice, where n=3-5.

| Gene symbol | Genotype effect | Age effect   | Interaction effect |
|-------------|-----------------|--------------|--------------------|
| Cdkn2a      | 0.502           | <b>0.046</b> | NS                 |
| Bmi1        | 0.192           | 0.335        | NS                 |
| Cdkn1a      | 0.673           | 0.091        | NS                 |
| Ccdnd1      | <b>0.011</b>    | 0.216        | NS                 |
| Ccnd2       | <b>0.033</b>    | 0.050        | NS                 |
| Cdkn1b      | 0.355           | <b>0.009</b> | NS                 |
| Cknnb1      | 0.761           | 0.153        | NS                 |
| Rb1         | <b>0.045</b>    | 0.698        | NS                 |
| Eprs1       | 0.272           | 0.405        | NS                 |
| Dnajb9      | 0.610           | 0.303        | NS                 |
| Ddit4       | 0.725           | 0.725        | NS                 |
| Ezh2        | 0.981           | <b>0.003</b> | NS                 |
| Ddit3       | 0.605           | 0.137        | NS                 |
| Cxcl1       | 0.244           | 0.098        | NS                 |
| Fox01       | 0.203           | 0.660        | NS                 |
| Atf4        | <b>0.045</b>    | 0.572        | NS                 |
| Atg7        | 0.298           | <b>0.004</b> | NS                 |
| Bcl2        | 0.930           | <b>0.004</b> | NS                 |
| Ccdn3       | 0.070           | 0.206        | NS                 |
| Cxcl5       | 0.159           | 0.471        | NS                 |
| Dppa5a      | 0.248           | 0.943        | NS                 |
| Fox03a      | 0.625           | 0.447        | NS                 |
| Gata2       | 0.174           | 0.547        | NS                 |
| Gfi1        | 0.653           | 0.408        | NS                 |
| Gsk3b       | 0.183           | 0.433        | NS                 |
| Irs1        | <b>0.020</b>    | <b>0.005</b> | <b>0.040</b>       |
| Irs2        | 0.254           | 0.464        | NS                 |
| Mc11        | 0.750           | 0.328        | NS                 |
| Mi67        | 0.718           | 0.691        | NS                 |
| Nfe212      | 0.234           | 0.915        | NS                 |
| Nrf1        | 0.367           | 0.873        | NS                 |
| Pck3r1      | 0.238           | 0.880        | NS                 |
| Pik3ca      | 0.407           | 0.094        | NS                 |
| Psm11       | 0.420           | 0.110        | NS                 |
| Pten        | 0.157           | 0.403        | NS                 |
| Rps6kb2     | 0.187           | <b>0.013</b> | <b>0.010</b>       |
| Sod1        | 0.754           | 0.750        | NS                 |
| Sod2        | 0.576           | 0.922        | NS                 |

|                          |       |              |    |
|--------------------------|-------|--------------|----|
| <b>Tgfb1</b>             | 0.224 | 0.300        | NS |
| <b>Trp53</b>             | 0.184 | 0.276        | NS |
| <b>Ulk1</b>              | 0.586 | 0.118        | NS |
| <b>Xbp1</b>              | 0.278 | <b>0.001</b> | NS |
| <b>Sk2b3</b>             | 0.655 | 0.360        | NS |
|                          |       |              |    |
| <b>18S<br/>(control)</b> | 0.462 | 0.133        | NS |

**Table S2.** List of probes used for qPCR analysis. Table displays gene name and assay ID of each Taqman™ probe used.

| <b>Gene name</b> | <b>Assay ID</b> |
|------------------|-----------------|
| 18S              | Mm03928990_g1   |
| Ccnd1            | Mm00432359_m1   |
| Ccnd2            | Mm00438070_m1   |
| Ccnd3            | Mm01612362_m1   |
| Cdkn2a           | Mm00494449_m1   |
| Cdkn1a           | Mm00432448_m1   |
| Cdkn1b           | Mm00438168_m1   |
| Mki67            | Mm01278617_m1   |
| Rb1              | Mm00485586_m1   |
| Ezh2             | Mm00468464_m1   |
| Bmi1             | Mm03053308_g1   |
| Gata-2           | Mm00492301_m1   |
| Gfi1             | Mm00515853_m1   |
| Fox01            | Mm00490671_m1   |
| Fox03            | Mm01185722_m1   |
| Atf4             | Mm00515324_m1   |
| Xbp1             | Mm00457357_m1   |
| Ddit3            | Mm00492097_m1   |
| Bcl2             | Mm00477631_m1   |
| Mcl1             | Mm01257351_g1   |
| Irs1             | Mm01278327_m1   |
| Irs2             | Mm03038438_m1   |
| Pik3ca           | Mm00435673_m1   |
| Pik3r1           | Mm01282781_m1   |
| Sod1             | Mm01344233_g1   |
| Sod2             | Mm01313000_m1   |
| Tgfb             | Mm01178820_m1   |
| Pten             | Mm00477208_m1   |



|           |                               |
|-----------|-------------------------------|
| S6K1      | Mm01310033_m1                 |
| S6K2      | Mm00445440_m1                 |
| Eprs      | Mm01315474_m1                 |
| Trp53     | Mm01731290_g1                 |
| Sh2b3     | Mm00833471_m1                 |
| Cxcl1     | Mm04207460_m1                 |
| Cxcl5     | Mm00436451_g1                 |
| Ulk1      | Mm00437238_m1                 |
| Nrf1      | Mm01135606_m1                 |
| Nfe2l2    | Mm00477784_m1                 |
| Ddit4     | Mm00512504_g1                 |
| Dnajb9    | Mm01622956_s1                 |
| Dppa5     | Mm01171664_g1                 |
| Psmc11    | Mm00780758_sH                 |
| Ctnnb1    | Mm00483039_m1                 |
| Gsk3b     | Mm00444911_m1                 |
| Atg7      | Mm00512209_m1                 |
| Gene name | Assay ID                      |
| 18S       | Mm03928990_g1                 |
| Ccnd1     | Mm00432359_m1                 |
| Ccnd2     | Mm00438070_m1                 |
| Ccnd3     | Mm01612362_m1                 |
| Cdkn2a    | Mm00494449_m1                 |
| Cdkn1a    | <a href="#">Mm00432448_m1</a> |
| Cdkn1b    | Mm00438168_m1                 |
| Mki67     | Mm01278617_m1                 |
| Rb1       | Mm00485586_m1                 |
| Ezh2      | Mm00468464_m1                 |
| Bmi1      | Mm03053308_g1                 |
| Gata-2    | Mm00492301_m1                 |
| Gfi1      | Mm00515853_m1                 |
| Foxo1     | Mm00490671_m1                 |
| Foxo3     | Mm01185722_m1                 |
| Atf4      | <a href="#">Mm00515324_m1</a> |
| Xbp1      | Mm00457357_m1                 |
| Ddit3     | Mm00492097_m1                 |
| Bcl2      | Mm00477631_m1                 |
| Mcl1      | Mm01257351_g1                 |
| Irs1      | <a href="#">Mm01278327_m1</a> |
| Irs2      | Mm03038438_m1                 |
| Pik3ca    | Mm00435673_m1                 |
| Pik3r1    | <a href="#">Mm01282781_m1</a> |
| Sod1      | Mm01344233_g1                 |
| Sod2      | Mm01313000_m1                 |

|        |                               |
|--------|-------------------------------|
| Tgfb   | Mm01178820_m1                 |
| Pten   | Mm00477208_m1                 |
| S6K1   | Mm01310033_m1                 |
| S6K2   | Mm00445440_m1                 |
| Eprs   | Mm01315474_m1                 |
| Trp53  | Mm01731290_g1                 |
| Sh2b3  | Mm00833471_m1                 |
| Cxcl1  | Mm04207460_m1                 |
| Cxcl5  | Mm00436451_g1                 |
| Ulk1   | <a href="#">Mm00437238_m1</a> |
| Nrf1   | Mm01135606_m1                 |
| Nfe2l2 | Mm00477784_m1                 |
| Ddit4  | Mm00512504_g1                 |
| Dnajb9 | Mm01622956_s1                 |
| Dppa5  | <a href="#">Mm01171664_g1</a> |
| Psmc11 | Mm00780758_sH                 |
| Cttnb1 | Mm00483039_m1                 |
| Gsk3b  | Mm00444911_m1                 |
| Atg7   | Mm00512209_m1                 |
